# Supplementary material for: Inhibition of NK Reactivity Against Solid Tumors by Platelet-Derived RANKL
Source: MDPI journal article supplement (doi:10.3390/cancers11030277), 2019-02-26

# Supplementary Materials: Inhibition of NK Reactivity Against Solid Tumors by Platelet-Derived RANKL

Kim L. Clar, Clemens Hinterleitner, Pascal Schneider, Helmut R. Salih and Stefanie Maurer

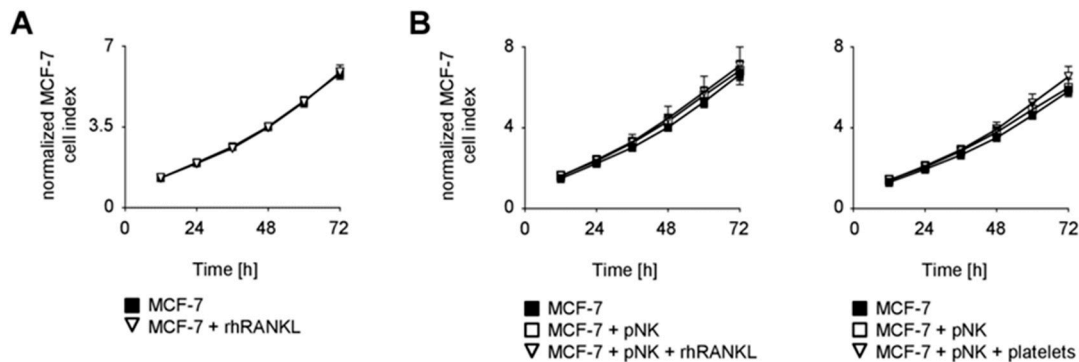

**Figure S1.** rhRANKL and NK cell/platelet-derived factors do not affect survival/proliferation of tumor cells. (A) MCF-7 cells were cultured in the presence or absence of rhRANKL (125 ng/mL). Tumor cell proliferation/survival was assessed by xCELLigence RTCA over 72 h. Results are shown as electrical impedance signal (given as cell index normalized after addition of rhRANKL to the tumor cells). (B) pNK cells were cultured in the presence or absence of 50,000 platelets/ $\mu$ L or rhRANKL (125 ng/mL) for 24 h. Then culture supernatants were collected and added to MCF-7 cell cultures at a ratio of 1:1. Tumor cell proliferation/survival was then analyzed as described in (A).

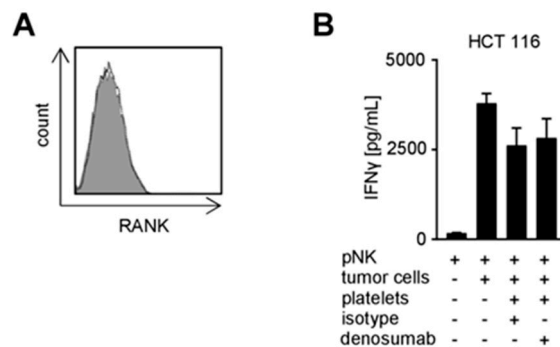

**Figure S2.** Denosumab does not affect NK cell reactivity via its Fc part. To exclude that denosumab affected NK reactivity by other mechanisms than RANKL neutralization, pNK cells lacking RANKL expression as determined by flow cytometry (A) were cultured in the presence or absence of the HCT 116 tumor cells and platelets from HD. Where indicated, denosumab (10  $\mu$ g/mL) or the respective isotype control was applied. IFN $\gamma$  levels in the culture supernatants were determined by ELISA after 24 h (B).

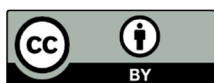

Supplement: s1 [file s1]
